# Supplementary material for: Symmetry of the H-N-H center in dilute III-N-V alloys determined by vibrational spectroscopy with applied stress
Source: Royal Society of Chemistry journal article supplement (doi:10.1039/d1ra01211h), 2010-03-17
Supplement: d1ra01211h1.pdf [file d1ra01211h1.pdf]

Supplementary Information

**Acidity Effects of Medium Fluids on Anhydrous Proton Conductivity of Acid-Swollen Block Polymer Electrolyte Membranes**

Takato Kajita,<sup>a</sup> Atsushi Noro,<sup>\*a,b</sup> Takahiro Seki,<sup>a</sup> Yushu Matsushita,<sup>#a</sup> and Naoki Nakamura<sup>c</sup>

<sup>a</sup> Department of Molecular & Macromolecular Chemistry, Graduate School of Engineering, Nagoya University, Furo-cho, Chikusa-ku, Nagoya 464-8603, Japan

<sup>b</sup> Institute of Materials Innovation, Institutes of Innovation for Future Society, Nagoya University, Furo-cho, Chikusa-ku, Nagoya 464-8601, Japan

<sup>c</sup> FC Material Development Dept., Electrification & Environment Material Engineering Div., Advanced R&D and Engineering Company, Higashifuji Technical Center, TOYOTA Motor Corporation, 1200 Mishuku, Susono, Shizuoka, Japan

<sup>#</sup> Present address: Toyota Physical and Chemical Research Institute, 41-1, Yokomichi, Nagakute, Aichi 480-1192, Japan

\*E-mail: [noro@nagoya-u.jp](mailto:noro@nagoya-u.jp)

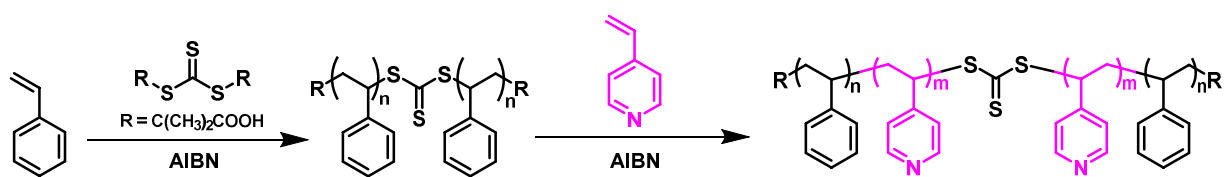

**Scheme S1** Synthesis of S-P-S.

**Macroscopic appearance of S-P-S/Sa and S-P-S/Pa membranes.**

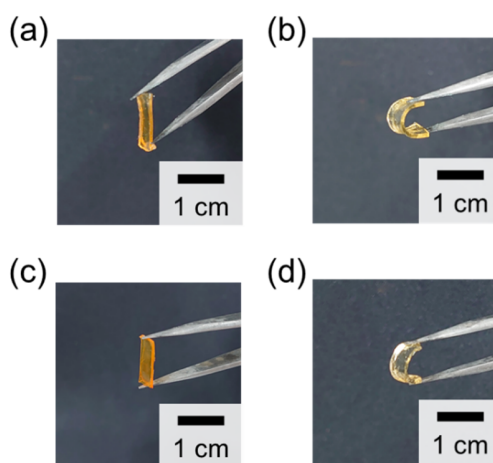

**Fig. S1** Macroscopic appearance of (a) S-P-S/Sa(40), (b) S-P-S/Sa(80), (c) S-P-S/Pa(40), and (d) S-P-S/Pa(80) membranes.

### Blends of S/Sa, P/Sa, S/Pa, and P/Pa.

The blends of S/Sa, P/Sa, S/Pa, and P/Pa were prepared to confirm compatibility of each component.

As shown in Figure S2, S cannot be dissolved in Sa and Pa whereas P is soluble in Sa and Pa within an acid-concentration range from 10 wt% to 90 wt%.

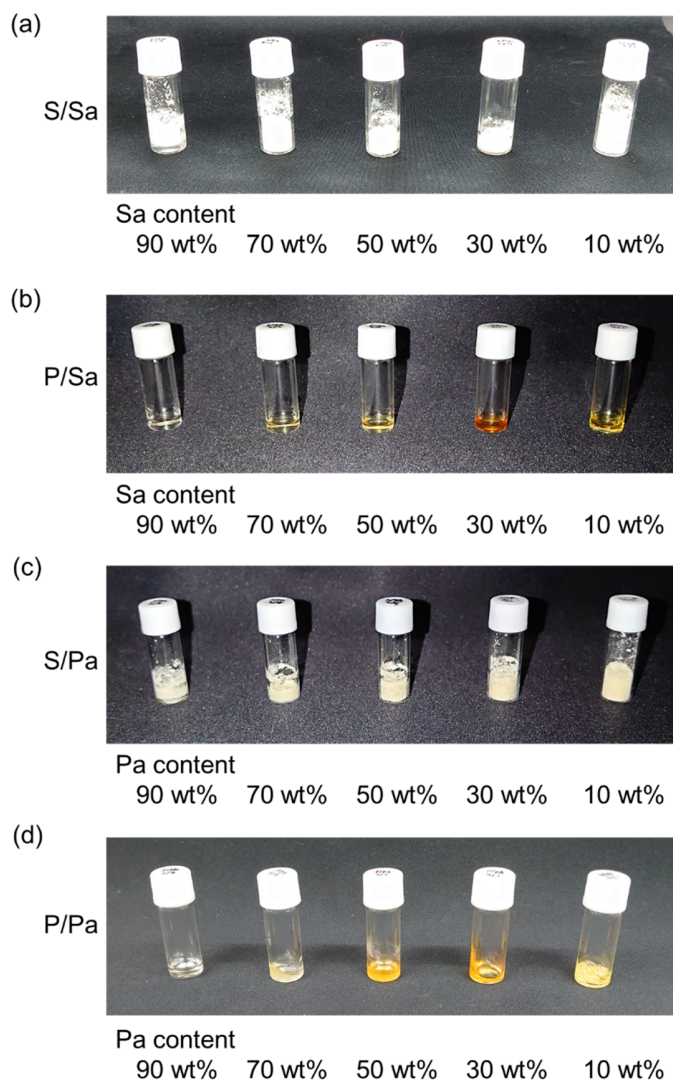

**Fig. S2** Photographs of blends of (a) S/Sa, (b) P/Sa, (c) S/Pa, and (d) P/Pa.

**<sup>1</sup>H NMR spectrum of S.**

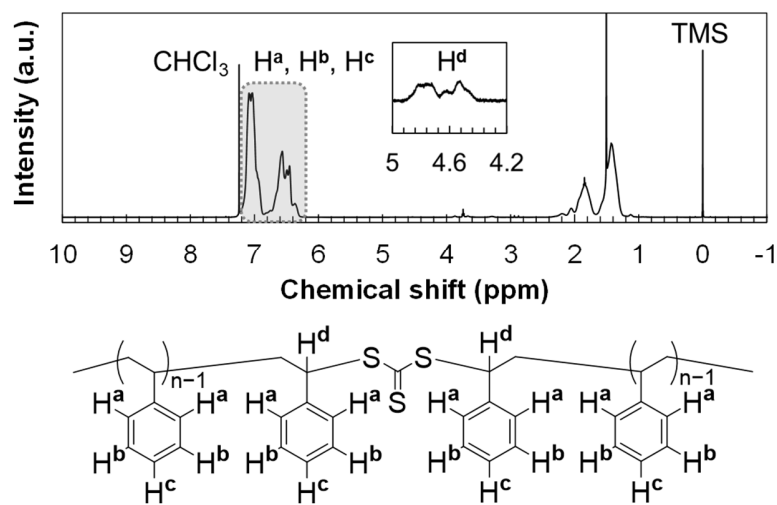

**Fig. S3** <sup>1</sup>H NMR spectrum and the chemical structure of precursor S, where the inset shows an enlarged view of the range from 4.2 to 5.0 ppm. The molecular weight of the precursor S was determined by comparing the integral of peaks from 4.2 to 5.0 ppm originating from two protons (H<sup>d</sup>) adjacent to the RAFT agent residue (S-C(=S)-S) with that of peaks from 6.0 to 7.2 ppm originating from five protons (H<sup>a</sup>, H<sup>b</sup> and H<sup>c</sup>) on the phenyl groups of the precursor S.

**Small angle X-ray scattering (SAXS) measurement of neat S-P-S.**

A SAXS measurement was performed at room temperature to acquire the nanostructural information of neat S-P-S membrane by Nano-Viewer (Rigaku). A wavelength of X-ray and a camera length were 0.1542 nm and 760 mm, respectively. A scattering pattern was detected with an imaging plate. Figure S4 shows a SAXS profile for neat S-P-S membrane.

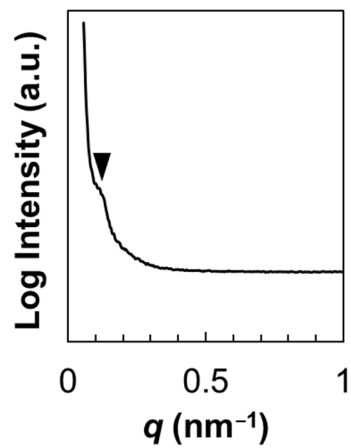

**Fig. S4** A SAXS profile for the neat S-P-S membrane.

**Anhydrous conductivity after keeping at 95°C.**

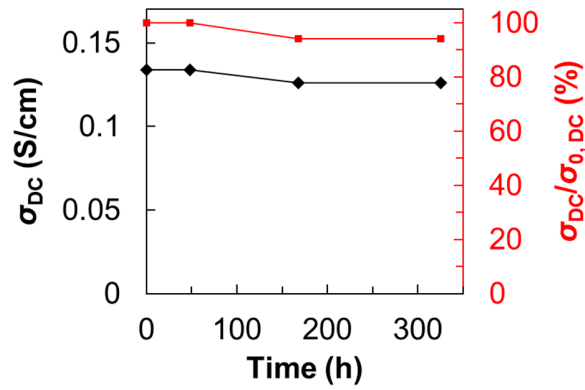

**Fig. S5** Anhydrous conductivities for the S-P-S/Sa(80) membrane after keeping at 95°C. Left axis is the anhydrous conductivity of the S-P-S/Sa(80) membrane. Right axis is the ratio of the anhydrous conductivity to the initial conductivity ( $\sigma_{0,DC}$ ). Black diamonds and red squares represent  $\sigma_{DC}$  and  $\sigma_{DC}/\sigma_{0,DC}$ , respectively. Solid lines are drawn as guide for eyes

### Fourier transform infrared (FT-IR) spectroscopy for S-P-S/Sa and S-P-S/Pa.

FT-IR spectroscopy was carried out using a spectrophotometer FT/IR-6600 (JASCO) at room temperature to confirm the formation of the acid-base complexes between pyridyl groups and the acids (Figure S5). Absorption at  $1595\text{ cm}^{-1}$  derives from stretching vibration of C-C on the pyridyl group. By infiltrating Sa or Pa into S-P-S, absorption at around  $1640\text{ cm}^{-1}$  appeared, suggesting formation of acid-base complex between the pyridyl group and the acids.<sup>1</sup> The absorption at  $1600\text{ cm}^{-1}$  probably derives from hydrogen bond between the pyridyl group and the acids. As the amount of the acids increases, the absorption at  $1595\text{ cm}^{-1}$  decreases, while the absorption at  $1640\text{ cm}^{-1}$  increases.

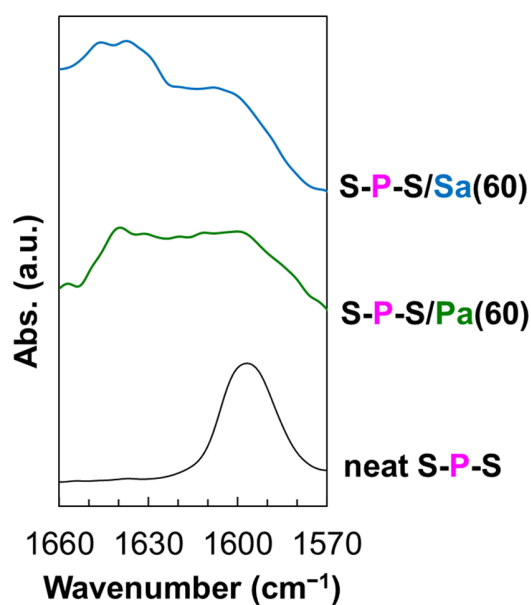

**Fig. S6** FT-IR spectra of neat S-P-S, S-P-S/Sa(60), and S-P-S/Pa(60) within a wavenumber range from  $1570$  to  $1660\text{ cm}^{-1}$ .

### **$T_g$ of S-P-S/Sa and S-P-S/Pa expected by Fox equation.**

A  $T_g$  of blends composed of a polymer and a solvent (plasticizer) depends on the composition, which are often given by Fox equation (Equation S1).<sup>2</sup>

$$\frac{1}{T_{g,\text{blend}}} = \frac{w_{\text{polymer}}}{T_{g,\text{polymer}}} + \frac{w_{\text{solvent}}}{T_{g,\text{solvent}}} \quad (\text{S1})$$

where  $T_{g,\text{blend}}$ ,  $T_{g,\text{polymer}}$ , and  $T_{g,\text{solvent}}$  are  $T_g$  of the blend composed of a polymer and a solvent, the polymer, and the solvent, respectively, while  $w_{\text{polymer}}$ , and  $w_{\text{solvent}}$  are weight fraction of the polymer, and the solvent in the mixture, respectively. Figure S6 shows  $T_g$  of P/acid mixed phase in S-P-S/Sa and S-P-S/Pa estimated from Equation S1, where  $T_g$  of Sa and Pa was assumed to be  $\sim 2T_m/3$ .<sup>3,4</sup> However, the calculated  $T_g$ s disagree with the experimental  $T_g$ s, especially, at ADL < 1 due to forming the acid-base complexes between the pyridyl groups and the acids in the membranes

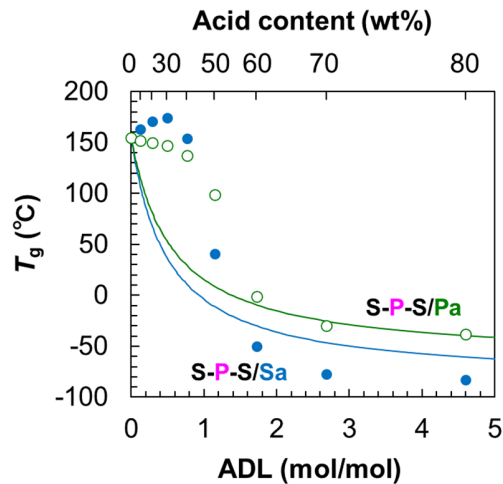

**Fig. S7** The experimental  $T_g$  of P/acid mixed phase in S-P-S/Sa (filled symbols) and S-P-S/Pa (open symbols). Solid blue (S-P-S/Sa) and green (S-P-S/Pa) lines are  $T_g$  calculated by from Fox equation.



**Table S1**  $T_g$  of P/acid mixed phase in S-P-S/Sa and S-P-S/Pa estimated by the DSC measurements

| Sample code  | ADL <sup>a</sup> (mol/mol) | $T_g$ (°C) |
|--------------|----------------------------|------------|
| neat S-P-S   | 0                          | 155        |
| S-P-S/Sa(10) | 0.13                       | 163        |
| S-P-S/Sa(20) | 0.29                       | 171        |
| S-P-S/Sa(30) | 0.49                       | 174        |
| S-P-S/Sa(40) | 0.77                       | 154        |
| S-P-S/Sa(50) | 1.1                        | 41         |
| S-P-S/Sa(60) | 1.7                        | -50        |
| S-P-S/Sa(70) | 2.7                        | -77        |
| S-P-S/Sa(80) | 4.6                        | -83        |
| S-P-S/Pa(10) | 0.13                       | 152        |
| S-P-S/Pa(20) | 0.29                       | 150        |
| S-P-S/Pa(30) | 0.49                       | 147        |
| S-P-S/Pa(40) | 0.77                       | 137        |
| S-P-S/Pa(50) | 1.1                        | 99         |
| S-P-S/Pa(60) | 1.7                        | -1         |
| S-P-S/Pa(70) | 2.7                        | -30        |
| S-P-S/Pa(80) | 4.6                        | -38        |

(a) Acid doping level that is the molar ratio of Sa or Pa to the pyridyl group on the polymer.

**Table S2** Anhydrous conductivity for a series of S-P-S/H<sub>2</sub>SO<sub>4</sub> and S-P-S/H<sub>3</sub>PO<sub>4</sub>

| Sample code  | ADL <sup>a</sup><br>(mol/mol) | $\sigma_{DC}$ <sup>b</sup> (S cm <sup>-1</sup> ) |                      |                      |                      |                      |                      |
|--------------|-------------------------------|--------------------------------------------------|----------------------|----------------------|----------------------|----------------------|----------------------|
|              |                               | 20 °C                                            | 35 °C                | 50 °C                | 65 °C                | 80 °C                | 95 °C                |
| S-P-S/Sa(50) | 1.1                           | $1.9 \times 10^{-6}$                             | $6.2 \times 10^{-6}$ | $1.7 \times 10^{-5}$ | $4.5 \times 10^{-5}$ | $9.9 \times 10^{-5}$ | $2.0 \times 10^{-4}$ |
| S-P-S/Sa(60) | 1.7                           | $7.0 \times 10^{-4}$                             | $1.5 \times 10^{-3}$ | $2.9 \times 10^{-3}$ | $5.0 \times 10^{-3}$ | $7.9 \times 10^{-3}$ | $1.2 \times 10^{-2}$ |
| S-P-S/Sa(70) | 2.7                           | $6.7 \times 10^{-3}$                             | $1.2 \times 10^{-2}$ | $1.6 \times 10^{-2}$ | $3.2 \times 10^{-2}$ | $4.5 \times 10^{-2}$ | $6.2 \times 10^{-2}$ |
| S-P-S/Sa(80) | 4.6                           | $2.3 \times 10^{-2}$                             | $3.8 \times 10^{-2}$ | $5.2 \times 10^{-2}$ | $7.6 \times 10^{-2}$ | $1.1 \times 10^{-1}$ | $1.4 \times 10^{-1}$ |
| S-P-S/Pa(50) | 1.1                           | n.d. <sup>c</sup>                                | $1.5 \times 10^{-6}$ | $6.7 \times 10^{-6}$ | $2.6 \times 10^{-5}$ | $8.3 \times 10^{-5}$ | $2.4 \times 10^{-4}$ |
| S-P-S/Pa(60) | 1.7                           | n.d. <sup>c</sup>                                | $5.4 \times 10^{-6}$ | $2.5 \times 10^{-5}$ | $9.1 \times 10^{-5}$ | $2.6 \times 10^{-4}$ | $6.5 \times 10^{-4}$ |
| S-P-S/Pa(70) | 2.7                           | $8.6 \times 10^{-5}$                             | $3.3 \times 10^{-4}$ | $9.8 \times 10^{-4}$ | $2.3 \times 10^{-3}$ | $4.5 \times 10^{-3}$ | $8.1 \times 10^{-3}$ |
| S-P-S/Pa(80) | 4.6                           | $2.9 \times 10^{-3}$                             | $7.0 \times 10^{-3}$ | $1.4 \times 10^{-2}$ | $2.6 \times 10^{-2}$ | $4.1 \times 10^{-2}$ | $6.1 \times 10^{-2}$ |

(a) Acid doping level that is the molar ratio of Sa or Pa to the pyridyl group on the polymer. (b) The conductivity estimated from electrochemical impedance spectroscopy. (c) The conductivity cannot be determined because it is very low.

## References

1. O. Ikkala, J. Ruokolainen, G. ten Brinke, M. Torkkeli and R. Serimaa, *Macromolecules*, 1995, **28**, 7088–7094.
2. W. Kauzmann, *Chem. Rev.*, 1948, **43**, 219–256.
3. S. Sakka and J. D. Mackenzie, *J. Non. Cryst. Solids*, 1971, **6**, 145–162.
4. M. A. B. H. Susan, T. Kaneko, A. Noda and M. Watanabe, *J. Am. Chem. Soc.*, 2005, **127**, 4976–4983.
